# Supplementary material for: Homoleptic gallium(iii) and indium(iii) aminoalkoxides as precursors for sol–gel routes to metal oxide nanomaterials
Source: Royal Society of Chemistry journal article supplement (doi:10.1039/b818974a), 2009-01-01
Supplement: b818974a.pdf [file b818974a.pdf]

## **Electronic Supplementary Information**

### **Homoleptic gallium(III) and indium(III) aminoalkoxides as precursors for sol-gel routes to metal oxide nanomaterials**

Shashank Mishra,<sup>a,\*</sup> Stéphane Daniele,<sup>a</sup> Sarah Petit,<sup>a</sup> Erwann Jeanneau<sup>b</sup> and Marc Rolland<sup>c</sup>

<sup>a</sup> Université Lyon1, IRCELYON, 2 av. A. Einstein, 69626 Villeurbanne, France.

E-mail: [mishrashashank74@rediffmail.com](mailto:mishrashashank74@rediffmail.com); Fax : +33 472445399; Tel: +33 472445329

<sup>b</sup> Université Lyon 1, Centre de Diffractométrie, 69622 Villeurbanne, France.

<sup>c</sup> Université Montpellier II, IEM, CNRS-ENSCM, Place Eugène Bataillon, 34095 Montpellier, France.

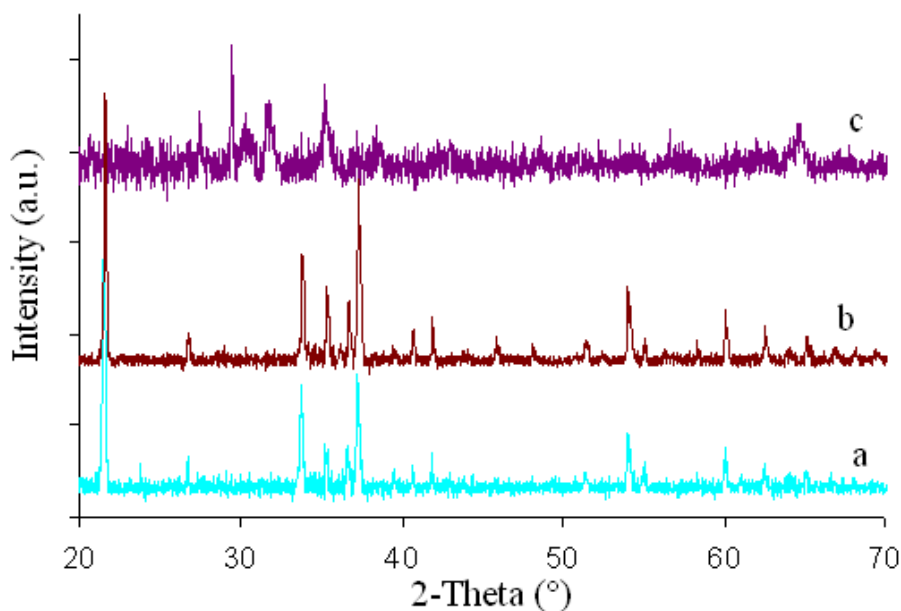

Fig. S1: XRD patterns of powders obtained after hydrolysis of **3**: (a) as-prepared, (b) as-prepared in presence of NR<sub>4</sub>Br, and (c) calcined at 500 °C.

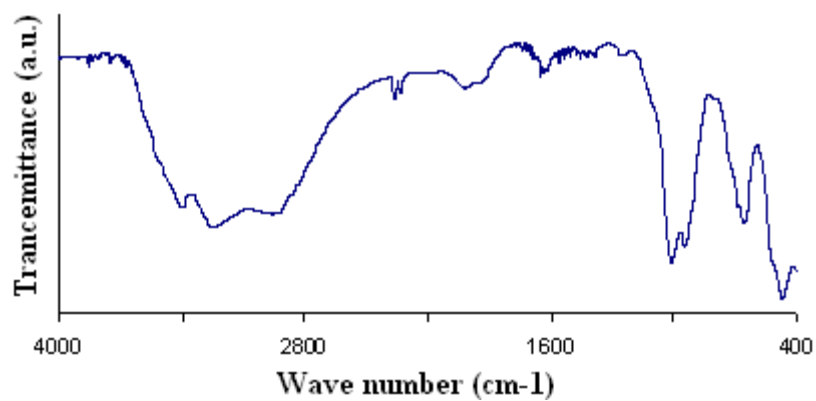

Fig. S2: FT-IR spectrum of as-prepared powder obtained after hydrolysis of Ga(OPr<sup>i</sup>)<sub>3</sub>

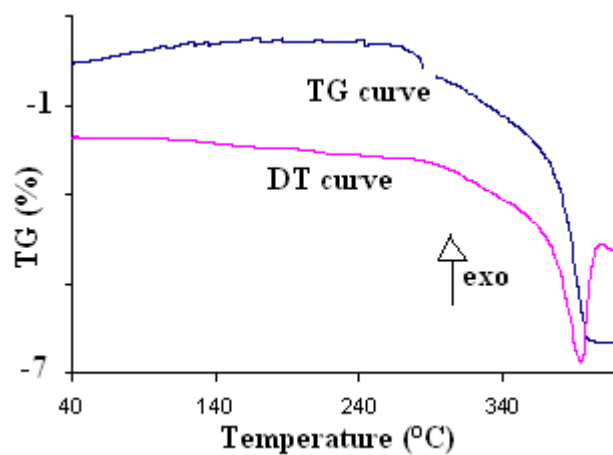

Fig S3. TG-DTA curves of as-prepared powder obtained after hydrolysis of Ga(OPr<sup>i</sup>)<sub>3</sub>

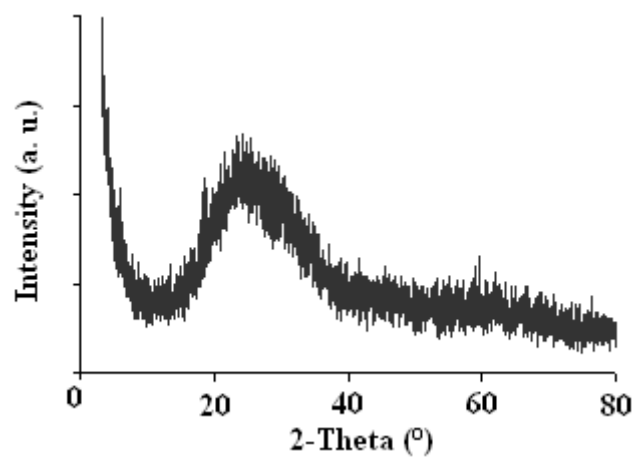

Fig S4. XRD of  $\text{Ga}_2\text{O}_3$  film on glass obtained from **1** and calcined at 500 °C for 4 hrs.

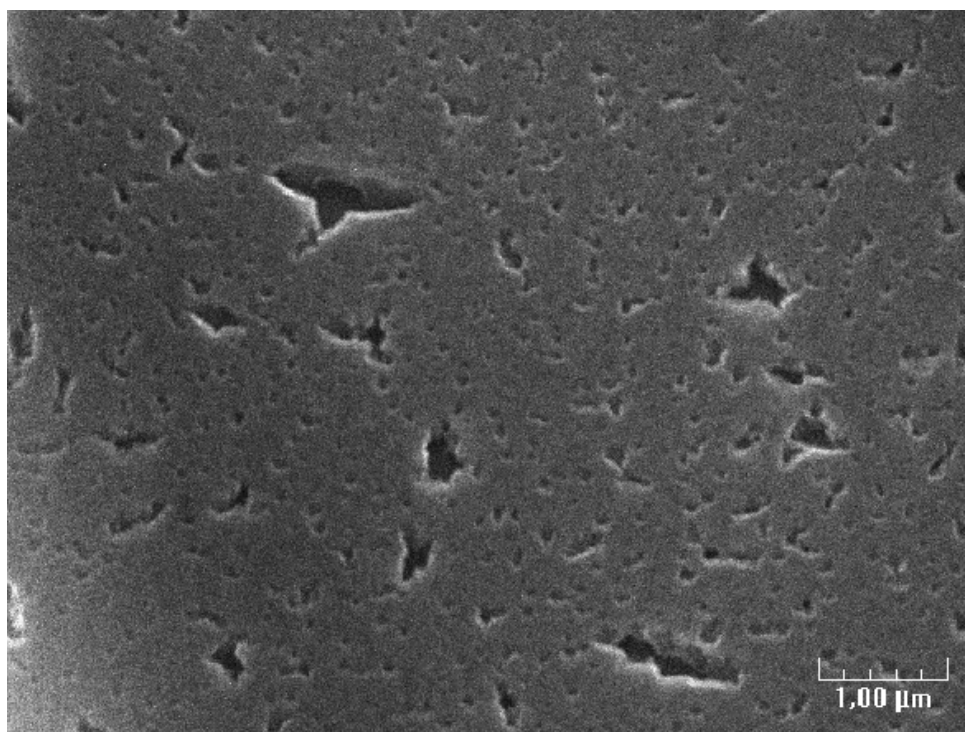

Fig S5: SEM images of  $\text{Ga}_2\text{O}_3$  films obtained from **1** on glass slide.

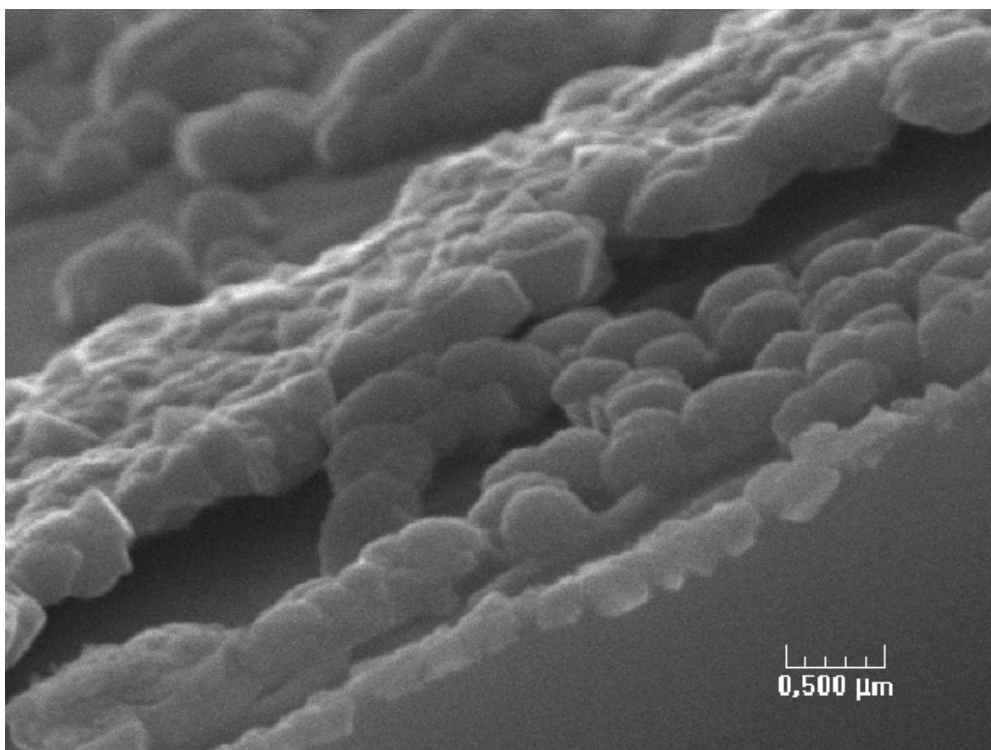

Fig S6: SEM images of In<sub>2</sub>O<sub>3</sub> film obtained from **2** on Si wafer.
